# Supplementary material
Source: PubMed Central journal article supplement (PMC4742415)
Supplement: NIHMS744048-supplement-1.pdf [file NIHMS744048-supplement-1.pdf]

## Supplementary Figure Legends

**Supplementary Figure 1. Comparison of RNP IC-mediated NET formation.** Quantification of DNA release induced by ICs consisting of SmRNP combined with SLE IgG 961 ( $n = 10$ ), 1032 ( $n = 6$ ) and 984 ( $n = 7$ ) or IgG from healthy individuals (HC IgG,  $n = 7$ ). The bars represent mean + SEM. For statistical analyses, all samples were compared to non-stimulated neutrophils using t-test with ns = non-significant,  $**P < 0.01$  and  $***P < 0.001$ .

**Supplementary Figure 2. RNP IC-mediated NETosis requires mitochondrial ROS.** Immunofluorescence microscopy of RNP IC-mediated NET formation in neutrophils from healthy individuals in presence of ROS inhibitors. The images are representative of 3 independent experiments.

**Supplementary Figure 3. RNP IC-mediated mitochondrial extrusion from neutrophils.** (a) Flow cytometry analysis of cell surface TOM20 levels in live (propidium iodide-negative) neutrophils upon RNP IC activation. (b) Quantification of 16S DNA levels in cells and NETs upon RNP IC activation. The results are normalized to non-stimulated cells. For statistical analyses, paired t-test was used with  $*P < 0.05$ ,  $**P < 0.01$  and  $***P < 0.001$ .

**Supplementary Figure 4. Interferogenic ability of DNA is dependent on oxidation.** DNA, isolated from nuclei (nuc) or mitochondria (mito) from several different species and cell types (HT: herring testes, mouse heart and spleen, Jurkat cells, human neutrophils (PMNs) and peripheral blood mononuclear cells (PBMCs)), were either exposed to UV-mediated oxidation (+) or not (-) and analyzed for 8-OHdG content (a, c) and interferogenic ability upon transfection into THP1 cells (b, d and e). Figures a–d are representative from individual experiments, and figure (e) is compiled data from  $n = 7$  paired samples. For statistical analyses, Spearman's correlation (b), Pearson's correlation (d) and paired t-test (e) were used with ns = non-significant,  $*P < 0.05$ ,  $**P < 0.01$  and  $***P < 0.001$ .

**Supplementary Figure 5. 8-OHdG<sup>+</sup> DNA ICs do not activate neutrophils.** Neutrophil activation by DNA-containing ICs was analyzed by (a) CD66b cell surface expression ( $n = 3$ ), (b) NET formation ( $n = 2$ ), (c–e) IC binding and phagocytosis by flow cytometry ( $n = 4$ ) as well as by (f) fluorescence microscopy ( $n = 2$ ). For statistical analyses, paired t-test was used with  $*P < 0.05$ ,  $**P < 0.01$  and  $***P < 0.001$ .

**Supplementary Figure 6. SLE patients have serologic evidence of ongoing NETosis.** Plasma samples from healthy controls ( $n = 20$ ) and SLE patients ( $n = 20$ ) were analyzed for markers of

NET formation; **(a)** citrullinated histone H4:MPO complexes, **(b)** DNA:human neutrophil elastase complexes and **(c)** DNA:MPO complexes. **(d)** Correlation between serum peroxidase activity and SLEDAI-2K ( $n = 16$ ). For statistical analyses, 2-sided unpaired t-test **(a)** and **(c)**, 2-sided unpaired Mann-Whitney test **(b)** and Spearman's correlation test **(d)** were used with  $*P < 0.05$ ,  $**P < 0.01$  and  $*** P < 0.001$ .

**Supplementary Figure 7. CGD patients have a type I IFN signature.** Quantification of ISG induction by healthy control and CGD sera ( $n = 15$  and  $22$  respectively). The results are expressed as fold induction index (mean  $\pm$  SEM) as compared to healthy control sera. For statistical analyses, unpaired Mann-Whitney test was used with  $*P < 0.05$  and  $**** P < 0.0001$ .

Supplementary Figure 1

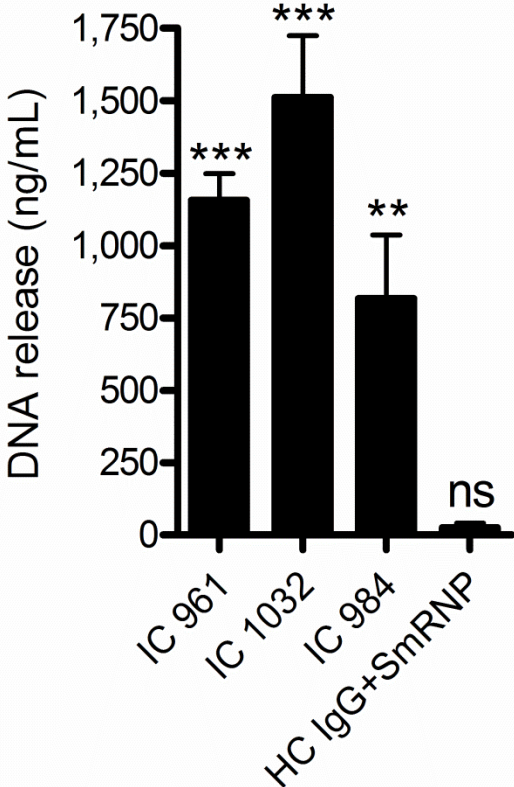

Supplementary Figure 2

Medium alone

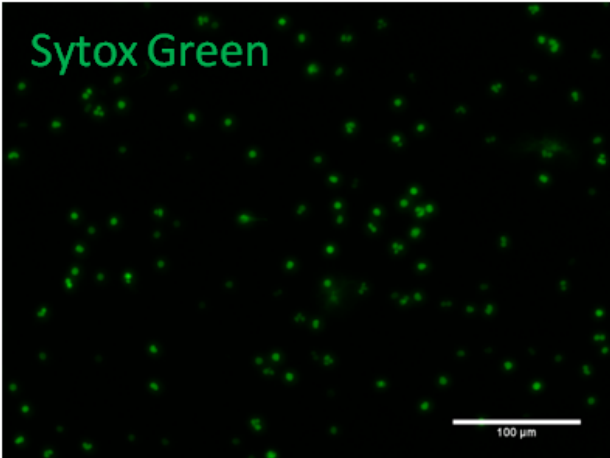

RNP ICs

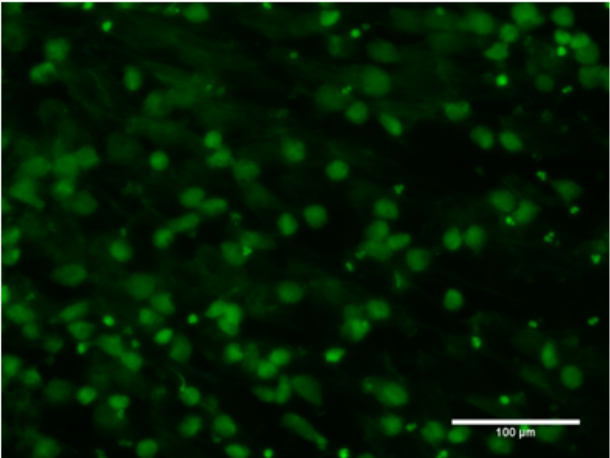

RNP ICs + DPI

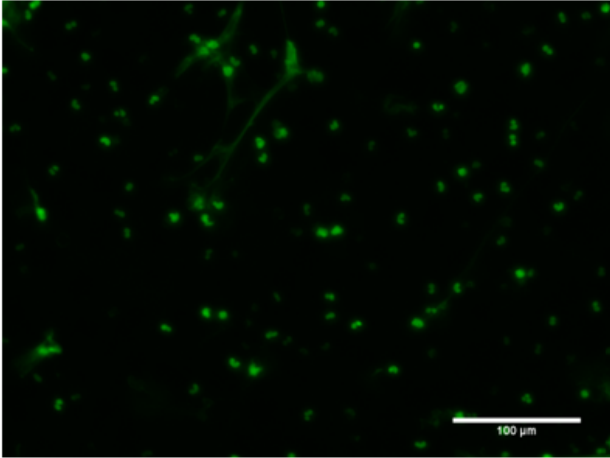

RNP ICs + TTFA

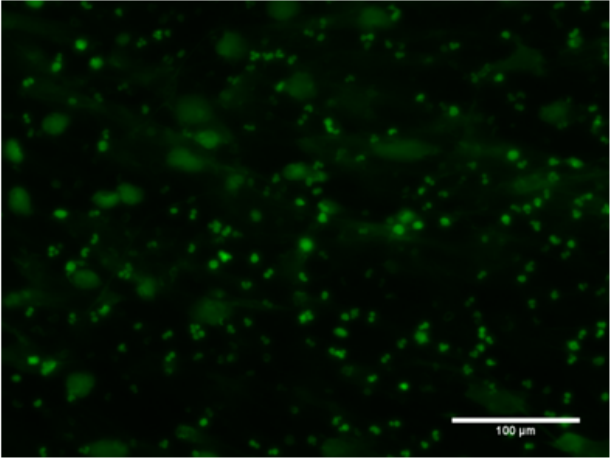

Supplementary Figure 3

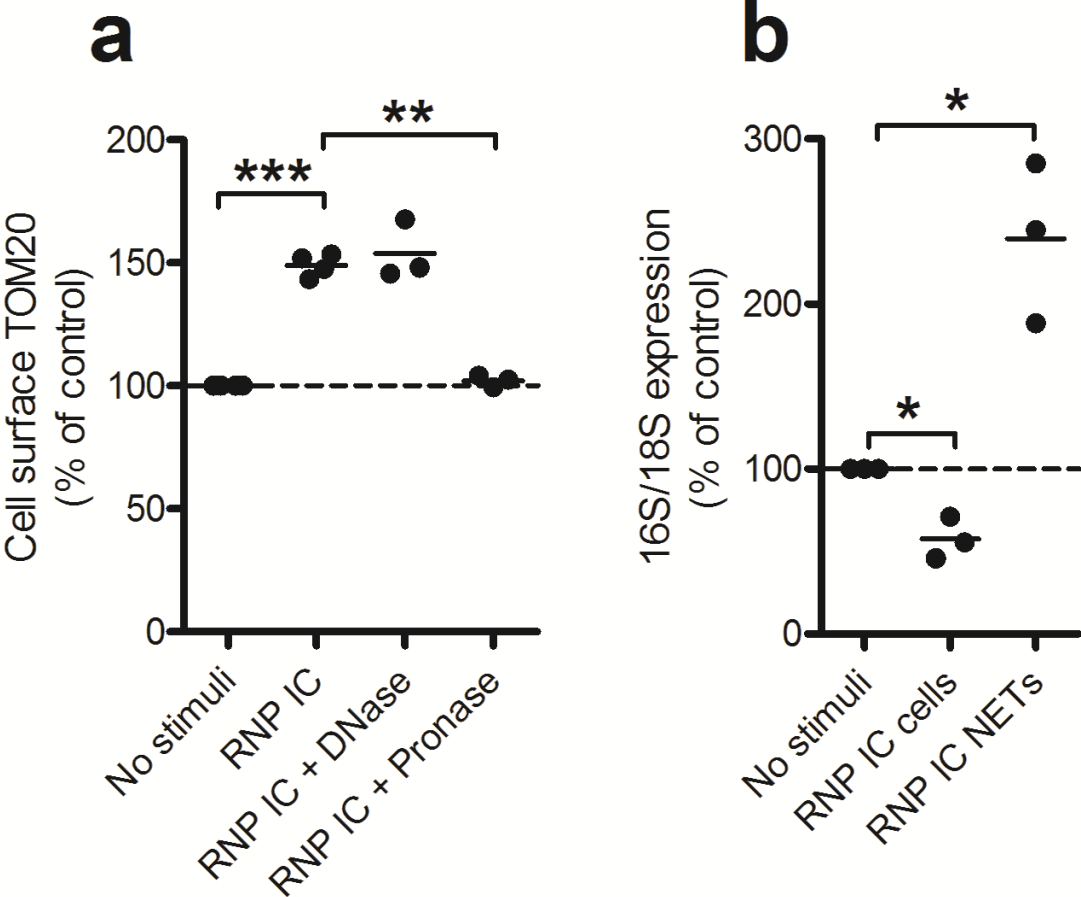

Supplementary Figure 4

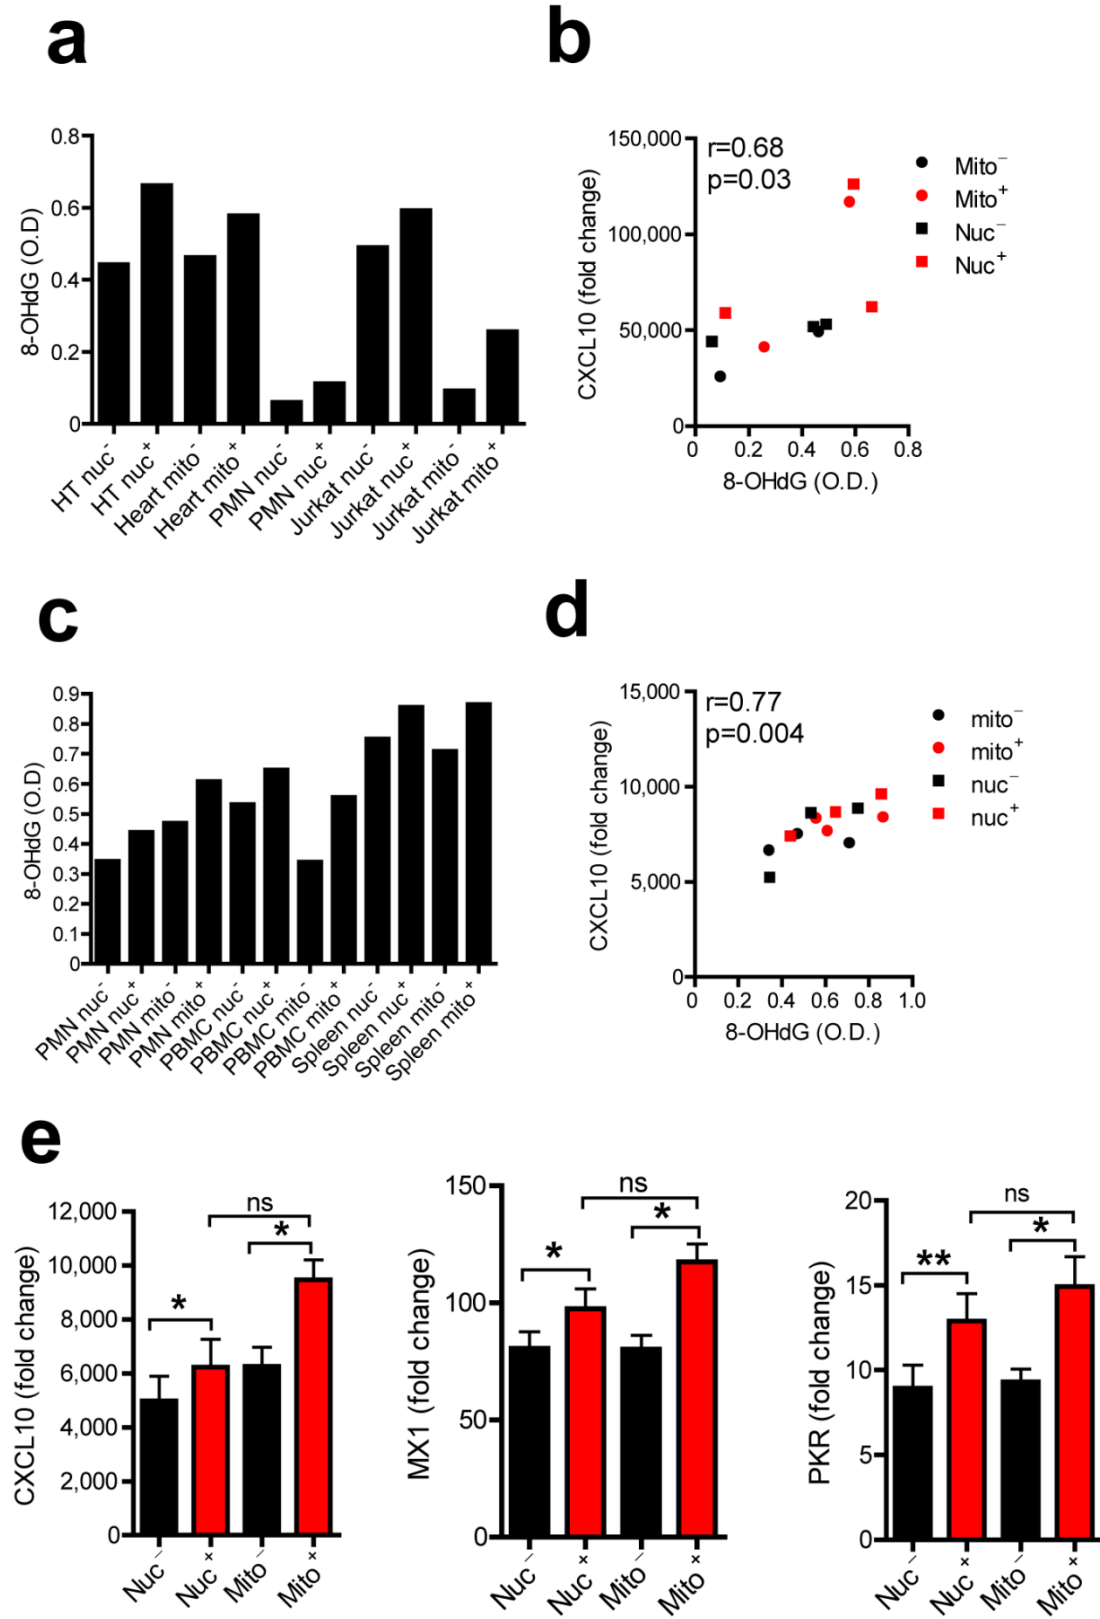

## Supplementary Figure 5

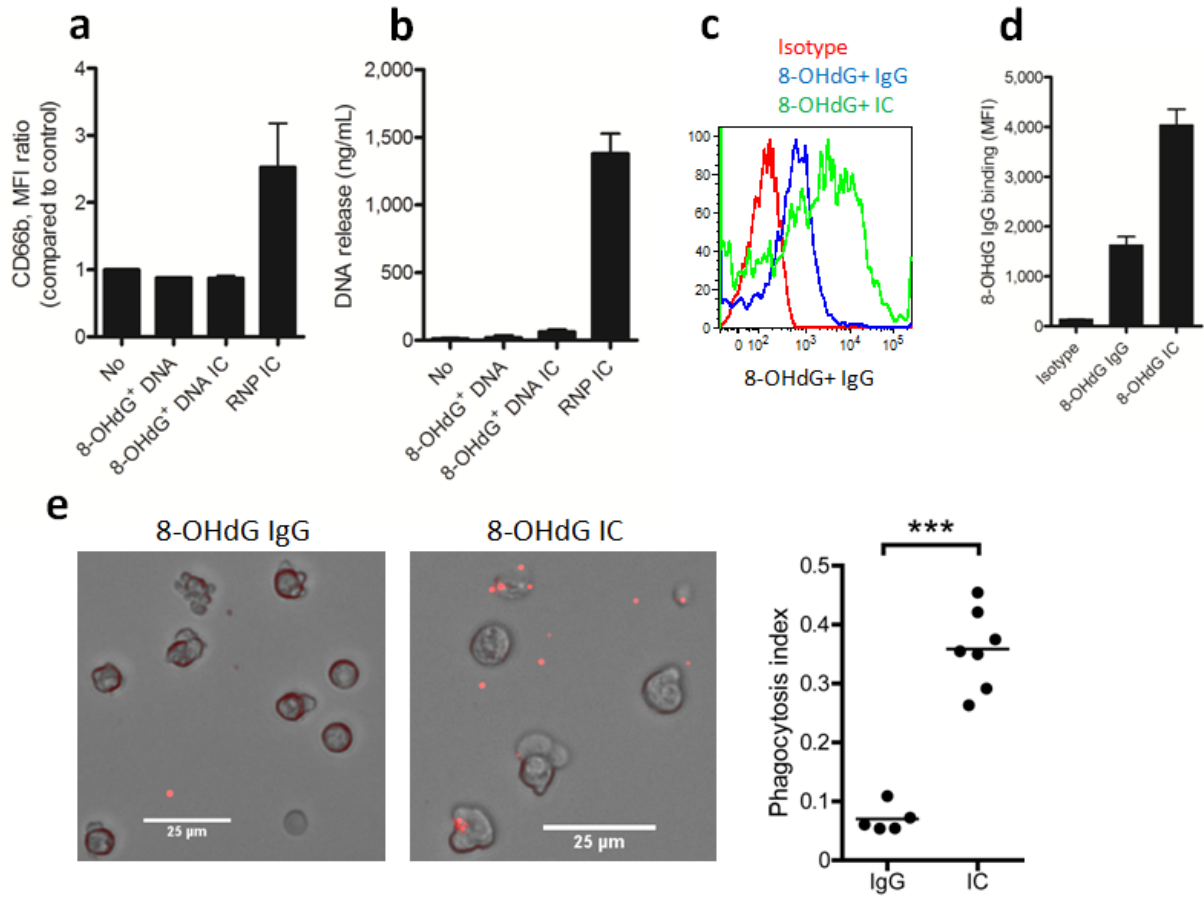

Supplementary Figure 6

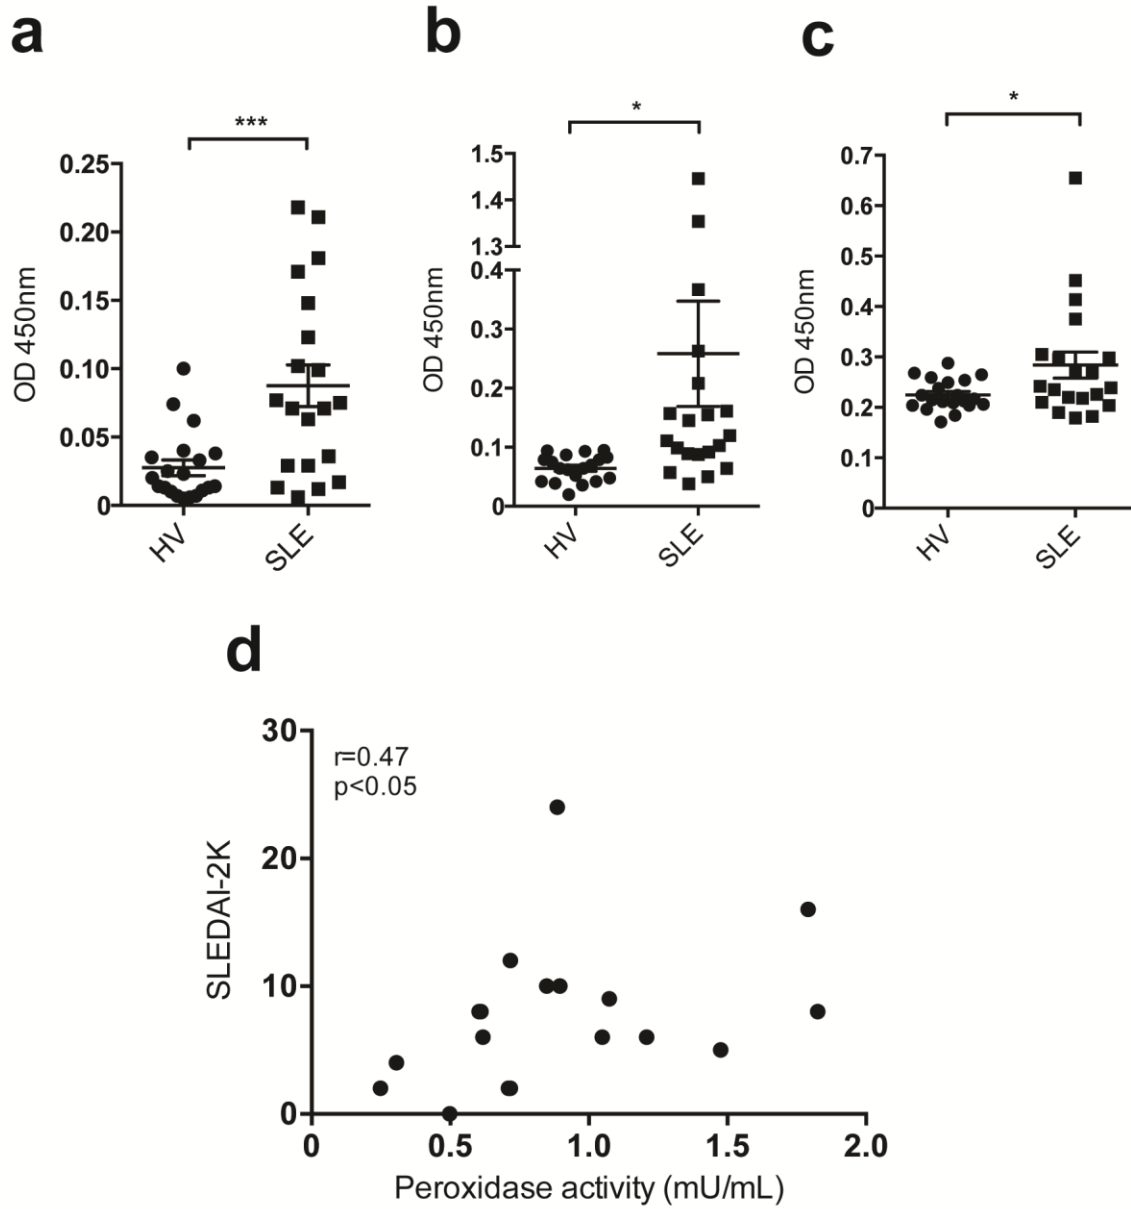



Supplementary Figure 7

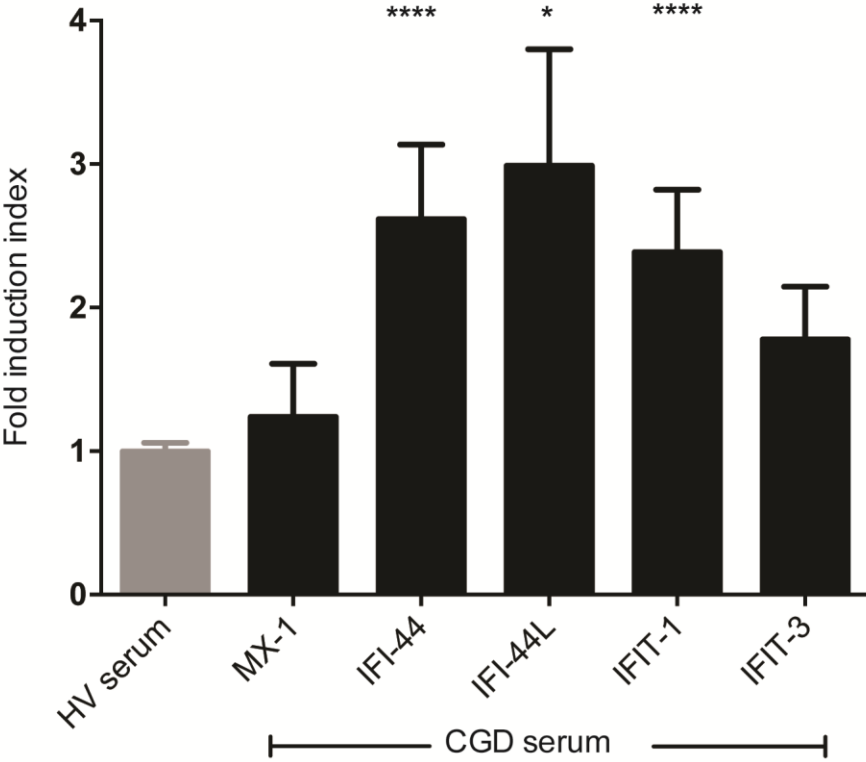

**Supplementary Table I. Demographics and clinical characteristics of CGD patients (n=22) at enrollment**

| <b>Characteristics</b>                 | <b>Percentage</b> |
|----------------------------------------|-------------------|
| Male                                   | 86.4              |
| Mean age, years (SEM)                  | 30.0 (1.7)        |
| p47 mutation ( <i>NCF1</i> )           | 59.1              |
| gp91 mutation ( <i>CYBB and CYBA</i> ) | 40.9              |
| X-linked mutations                     | 63.6              |
| Autosomal recessive mutations          | 36.4              |
| Clinical autoimmunity                  | 68.2              |
| - Inflammatory bowel disease           | 13.6              |
| - Cutaneous or systemic lupus          | 13.6              |
| - Vasculitis                           | 4.5               |
| - Celiac disease                       | 4.5               |
| - Type-I diabetes                      | 4.5               |
| - Psoriasis                            | 4.5               |
| - Sarcoidosis                          | 4.5               |
| - Juvenile idiopathic arthritis        | 4.5               |
| Immunosuppression                      | 59.1              |
| - Prednisone                           | 59.1              |
| - Azathioprine                         | 9.1               |
| - Methotrexate                         | 4.5               |

|                                 |                      |
|---------------------------------|----------------------|
| - 6-Mercaptopurine              | 4.5                  |
| - Hydroxychloroquine            | 4.5                  |
| - Anakinra                      | 4.5                  |
| Hypocomplementemia              | 18.2                 |
| ANA, anti-ENA and/or anti-dsDNA | 36.4                 |
| Rheumatoid factor               | 13.6                 |
| Anti-CCP                        | 9.1                  |
| aPL antibodies                  | 13.6                 |
| LDGs/mL blood (mean $\pm$ SEM)  | 238,365 $\pm$ 95,630 |
| Superoxide residual activity *  | 2.12 $\pm$ 1.21      |
| - p47 mutation                  | 2.90 $\pm$ 0.64      |
| - gp91 mutation                 | 1.04 $\pm$ 1.33      |

Abbreviations used in the table: CGD: chronic granulomatous disease; NCF1: neutrophil cytosolic factor1; CYBB: cytochrome b-245, alpha polypeptide; CYBA: cytochrome b-245, alpha polypeptide; ANA: antinuclear antibody; ENA; anti-extractable nuclear antigen antibody (includes Ro, LA, Sm, SmRNP, RNP); dsDNA: double-stranded DNA; ANCA: anti-neutrophil cytoplasmic antibody (includes anti-myeloperoxidase, and anti-proteinase-3 antibodies); CCP: anti-cyclic citrullinated peptide Antibodies; aPL: anti-phospholipid antibodies (includes lupus anticoagulant, anti-cardiolipin antibodies and beta-2 glycoprotein antibodies). \* Extracellular superoxide residual activity is quantified by the cytochrome C assay as nmol per  $10^6$  cells per hour and represents mean  $\pm$  SD of all CGD patients and also divided by type of mutation. As reference, normal superoxide production is  $222.6 \pm 3$  nmol/ $10^6$  cells per hour.
